# Supplementary material
Source: PubMed Central journal article supplement (PMC5851415)
Supplement: ba010348-suppl1.pdf [file ba010348-suppl1.pdf]

## Supplementary S1

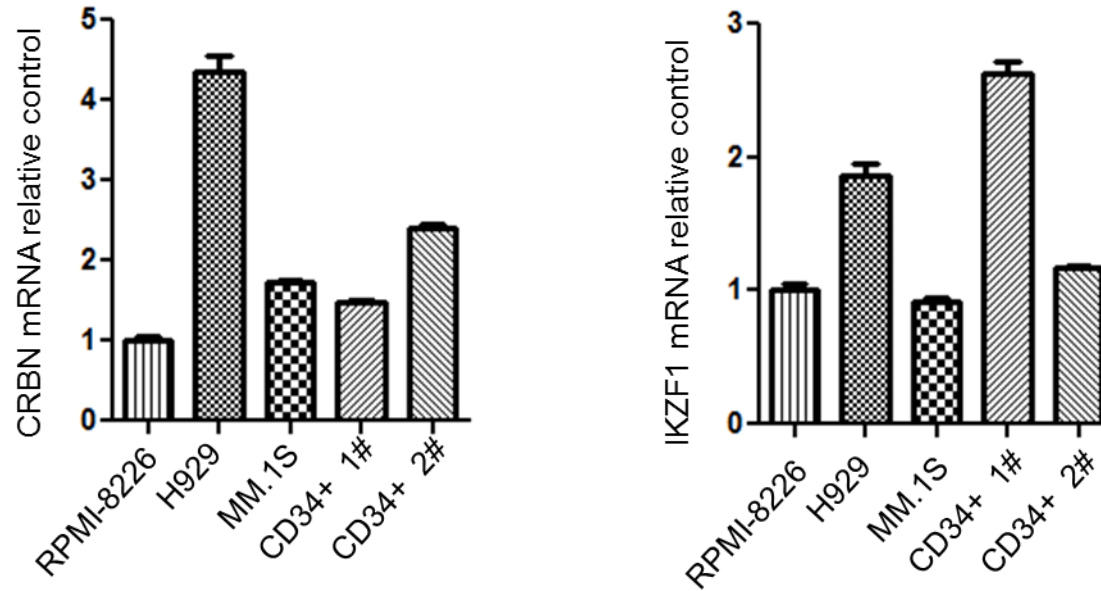

mRNA expression of CRBN and IKZF1 was analyzed in human myeloma cell lines (RPMI-8226, H929, MM.1S) and human CD34<sup>+</sup> cells #1 and 2 by RT-PCR.

## Supplementary S2

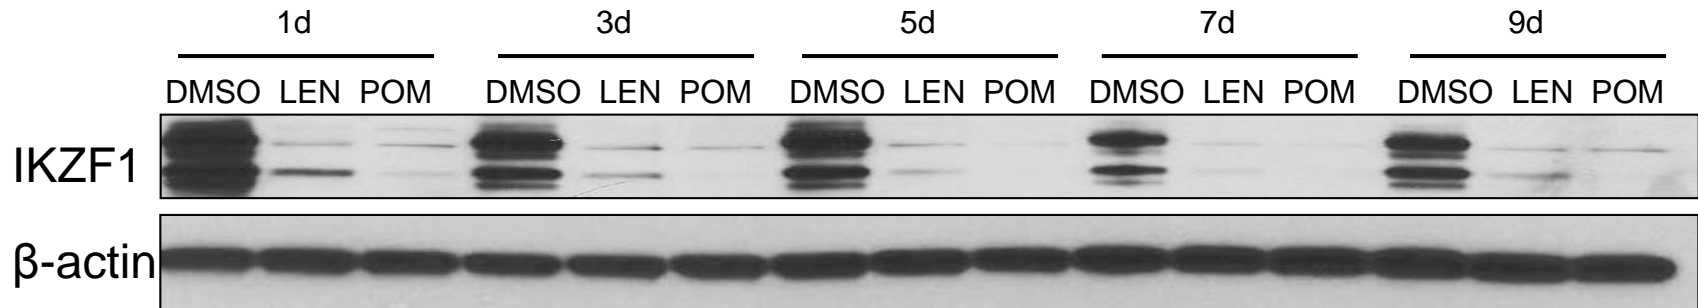

CD34<sup>+</sup> cells were treated with either DMSO (0.01%), LEN (1  $\mu$ M) or POM (1  $\mu$ M) for 1d. Then wash them and culture only with culture medium, which were changed every 2 days. Cells lysates were analyzed for IKZF1 and CRBN expression by western blotting.

## Supplementary S3

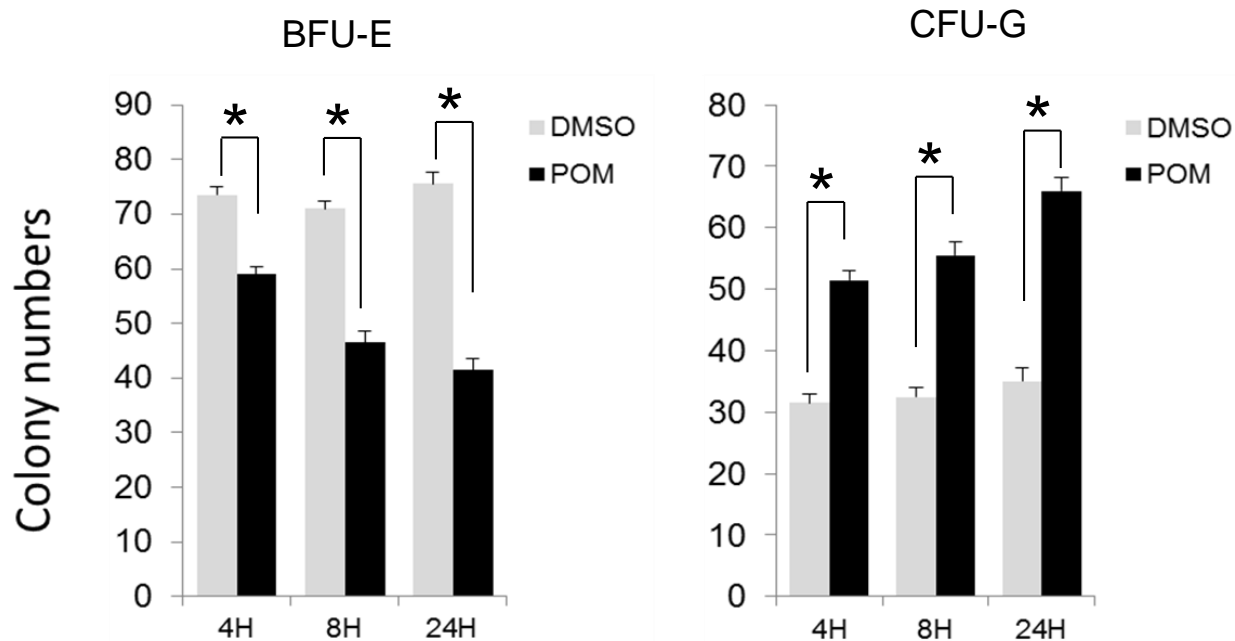

CD34<sup>+</sup> cells were treated with DMSO (0.01%) or POM (1  $\mu$ M) for 4H, 8H or 24H and used for a colony formation assay to evaluate BFU-E colony formation. After 14 d, the colony numbers were counted under Leica microscope (25X).

## Supplementary S4

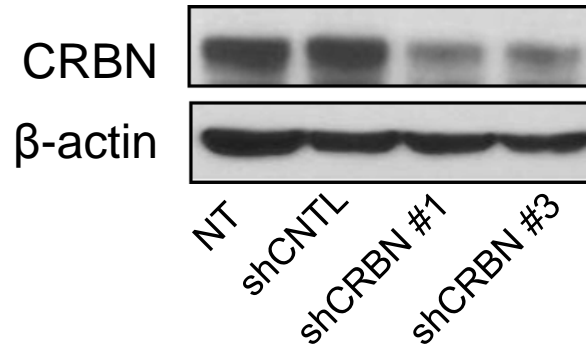

CD34<sup>+</sup> cells were transduced by lentivirus with control shRNA (shCNTL), CRBN-shRNA #1 (shCRBN #1) or CRBN-shRNA #3 (shCRBN #3). Transfected cells were sorted by GFP positive after 3 days of transduction. Cell lysates were analyzed by western blotting to compare the levels of CRBN.  $\beta$ -actin was used as control.

## Supplementary S5

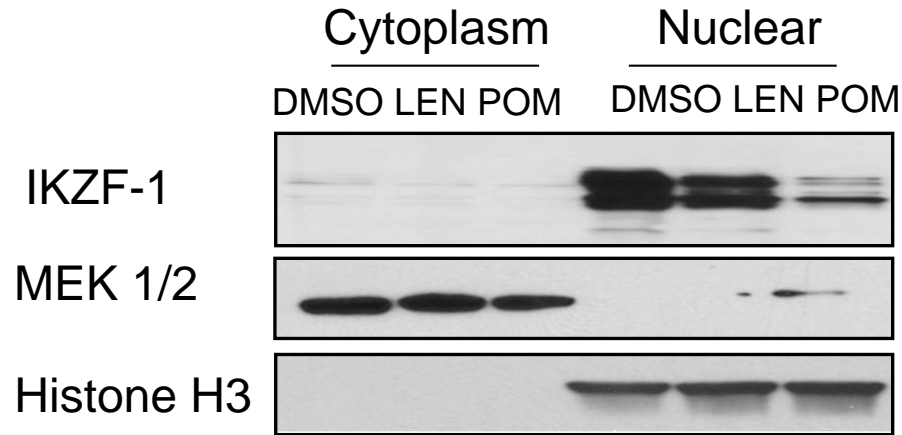

CD34<sup>+</sup> cells were cultured with DMSO (0.01%), LEN (1 $\mu$ M) or POM (1 $\mu$ M) for 24h , and then cytoplasm and nuclear fractions were extracted separately . IKZF1, MEK  $\frac{1}{2}$  and Histone H3 levels were compared by western blot.

## Supplementary S6

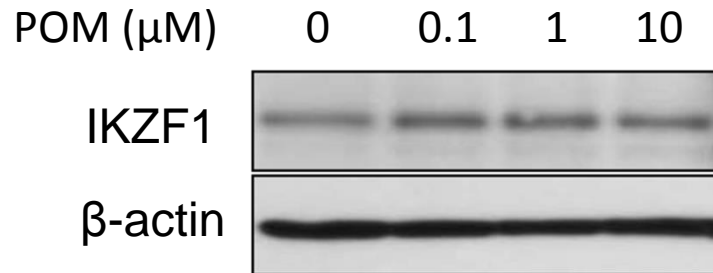

Mice CD117<sup>+</sup> cells were cultured with POM at the indicated concentrations for 24h. Cells lysates were analyzed for IKZF1 expression by western blotting.
